# Supplementary material for: Fabrication of CeO2/GCE for Electrochemical Sensing of Hydroquinone
Source: MDPI journal article supplement (doi:10.3390/bios12100846), 2022-10-08
Supplement: s1 [file s1]

# Supplementary Information: Fabrication of CeO<sub>2</sub>/GCE for electrochemical sensing of hydroquinone

Archana Chaudhary<sup>a,1</sup>, Mohd Quasim Khan<sup>b</sup>, Rais Ahmad Khan<sup>c</sup>, Ali Alsalmec<sup>\*</sup>, Khursheed Ahmad<sup>d,1</sup>, Haekyoung Kim<sup>d,\*</sup>

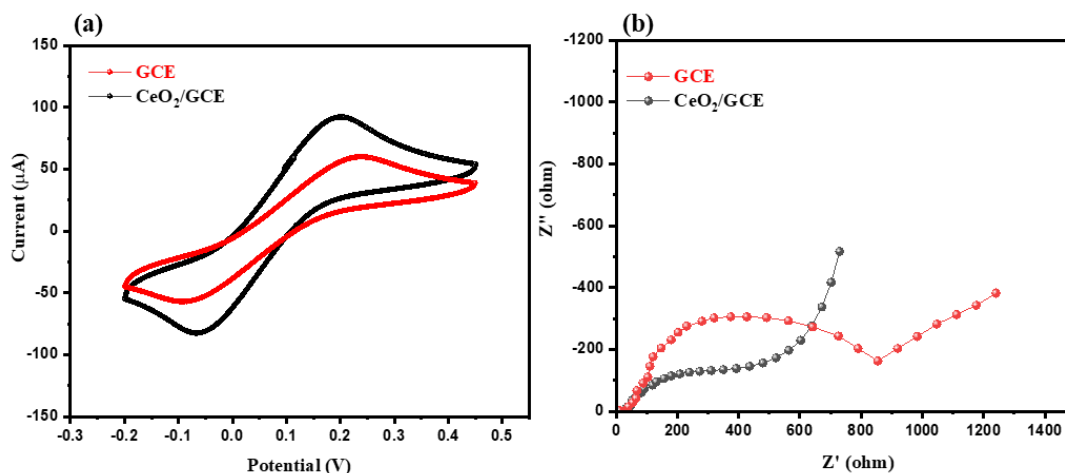

**Figure S1.** CVs (a) and Nyquist plot (b) of GCE and CeO<sub>2</sub>/GCE in 5 mM [Fe(CN)<sub>6</sub>]<sup>3-/4-</sup> in 0.1 M KCl in the applied frequency ranges of 0.1 Hz-100 kHz. .
